# Supplementary material for: A Transcriptome-Level Study Identifies Changing Expression Profiles for Ossification of the Ligamentum Flavum of the Spine
Source: PubMed Central journal article supplement (PMC6120750; doi:10.1016/j.omtn.2018.07.018), 2018-08-07
Supplement: mmc1.pdf [file mmc1.pdf]

OMTN, Volume 12

## Supplemental Information

### **A Transcriptome-Level Study Identifies Changing Expression Profiles for Ossification of the *Ligamentum Flavum* of the Spine**

**Yawei Han, Yuheng Hong, Liandong Li, Tengshuai Li, Zhen Zhang, Jingzhao Wang, Han Xia, Yutao Tang, Zhemin Shi, Xiaohui Han, Ting Chen, Qi Liu, Mengxia Zhang, Kun Zhang, Wei Hong, and Yuan Xue**

## Supplementary Figures

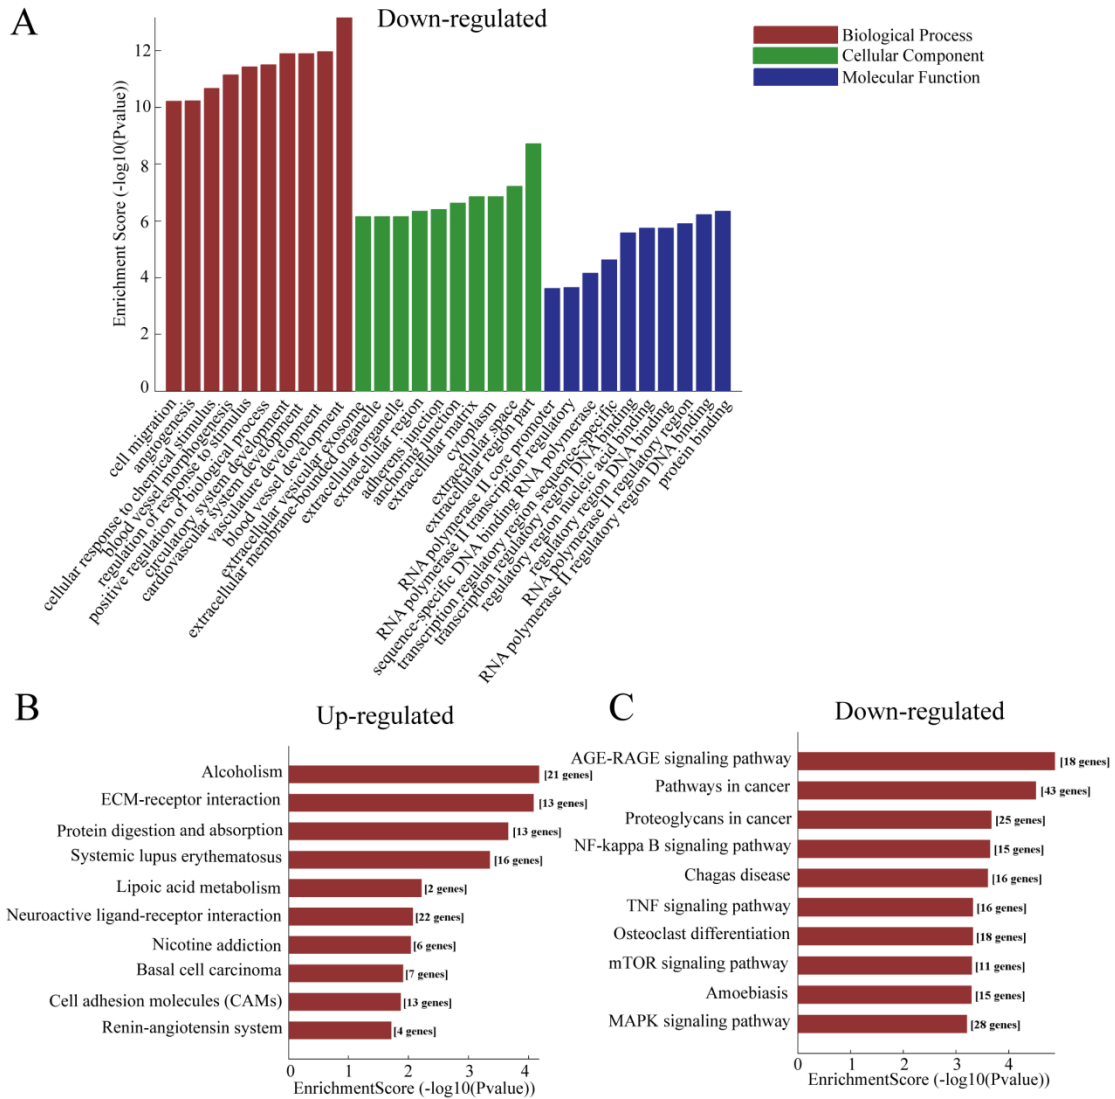

**Supplementary Figure 1. GO and KEGG pathway analysis of differentially expressed mRNAs. (A)**

GO annotation of the down-regulated mRNAs with top ten enrichment score covering domains of biological processes, cellular components and molecular functions were performed. (B-C) KEGG pathway enrichment analysis of up- (B) and down-regulated (C) mRNAs with top ten enrichment score was performed. Both up- and down-regulated mRNAs are significantly changed with fold change > 2.0,  $p < 0.05$  between OLF and normal LF tissues.

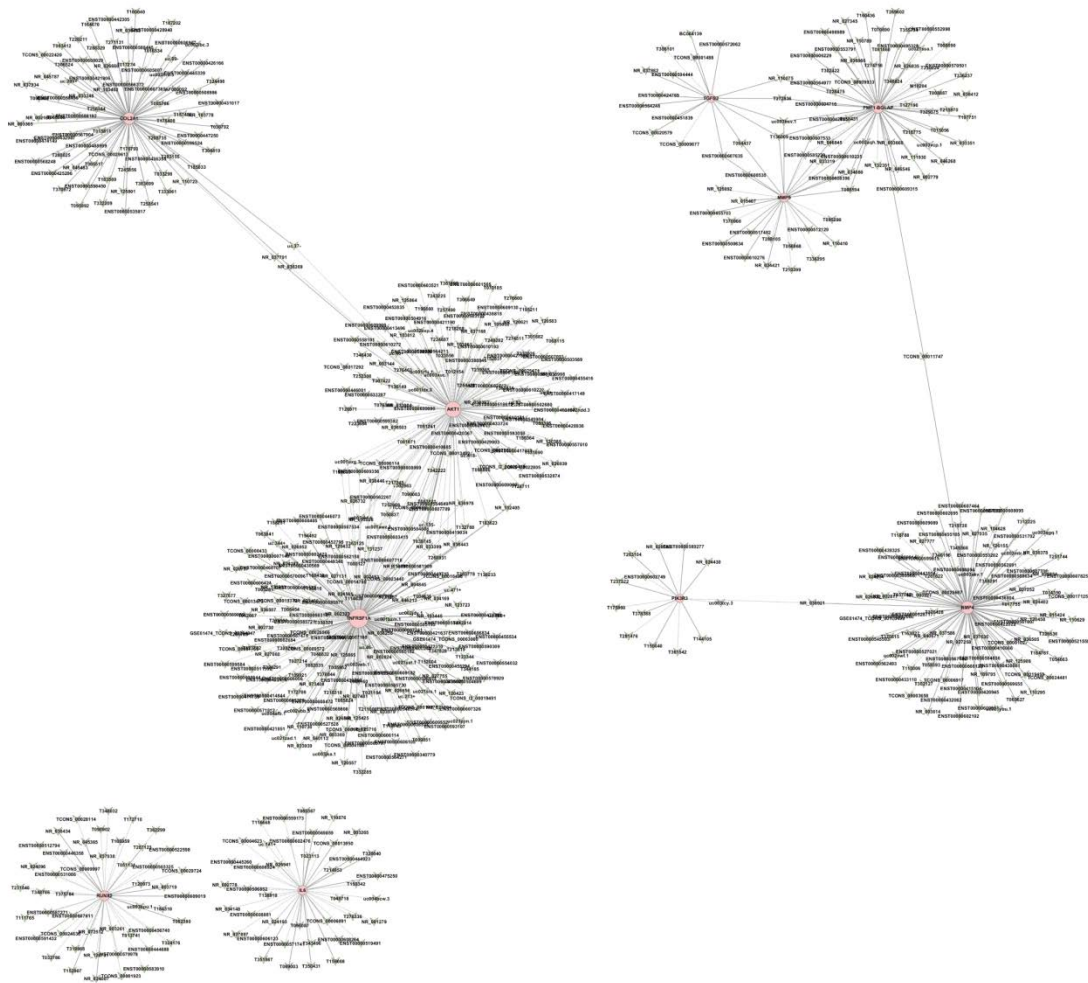

**Supplementary Figure 2. Co-expression network of ten significantly deregulated mRNAs and their co-expressed lncRNAs.** The coding genes, including RUNX2, MMP9, BGLAP, IL6, COL2 $\alpha$ 1, AKT1, TNFRSF1A, TGFB2, BMP4 and PIK3R3, and their co-expressed lncRNAs, that have Pearson correlation coefficients  $\geq 0.968$  were chosen to draw the network using Cytoscape. V nodes represent lncRNA and circle nodes represent mRNAs. Solid lines represent positive relationship and dash lines represent negative relationship.

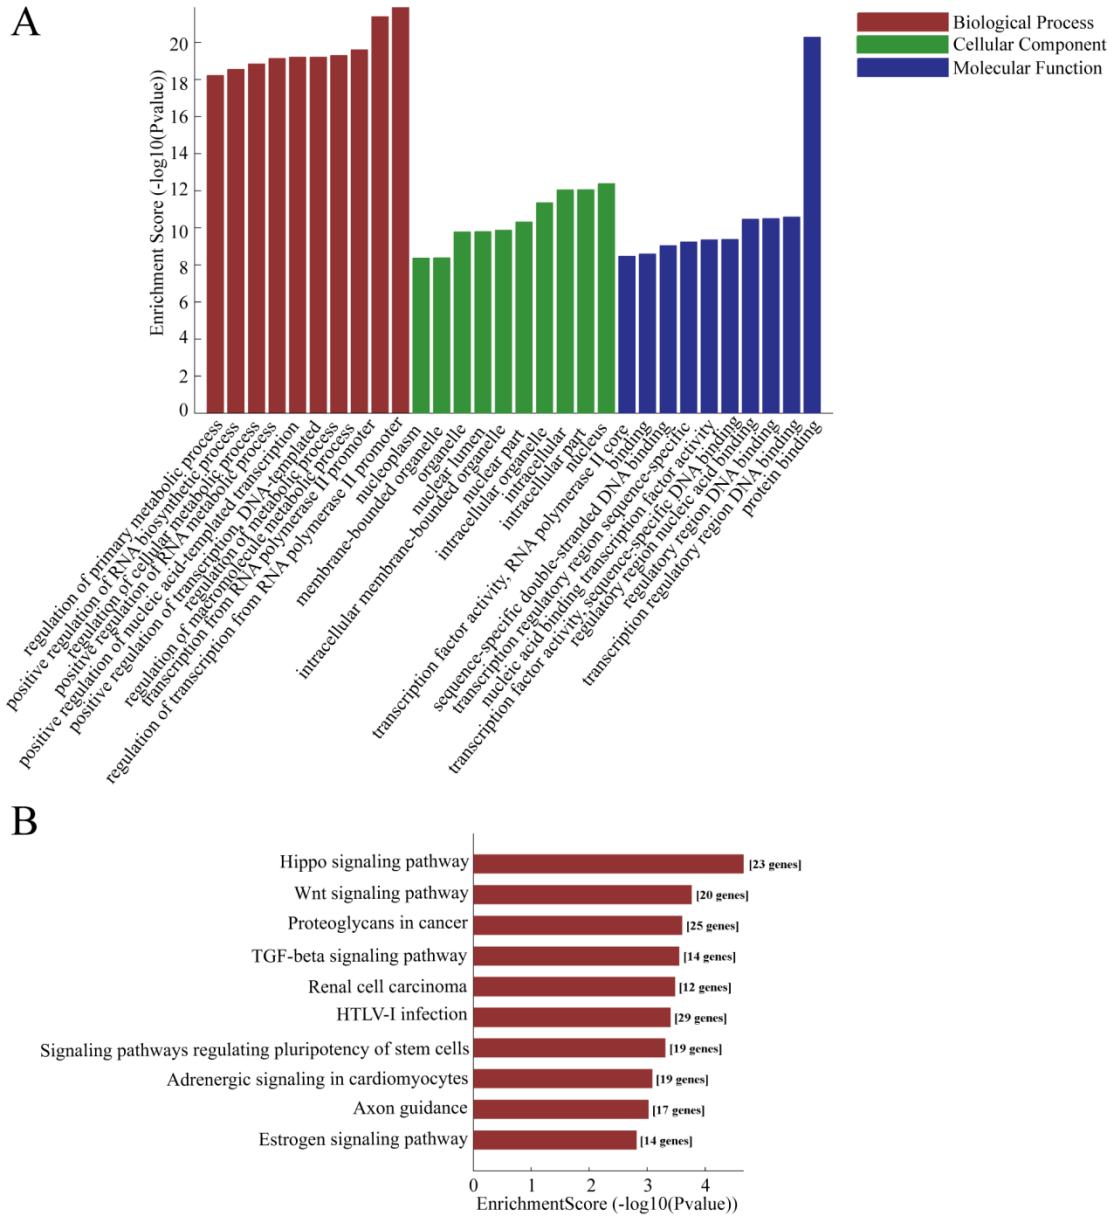

**Supplementary Figure 3. GO and KEGG pathway analysis of miRNAs target genes.** (A) GO annotation of all targeted mRNAs of deregulated miRNAs with top ten enrichment score covering domains of biological processes, cellular components and molecular functions was performed. (B) KEGG pathway enrichment analysis of targeted mRNAs of all deregulated miRNA with top ten enrichment score was performed. Both up- and down-regulated miRNAs are significantly changed with fold change > 2.0,  $p < 0.05$  between OLF and normal LF tissues.

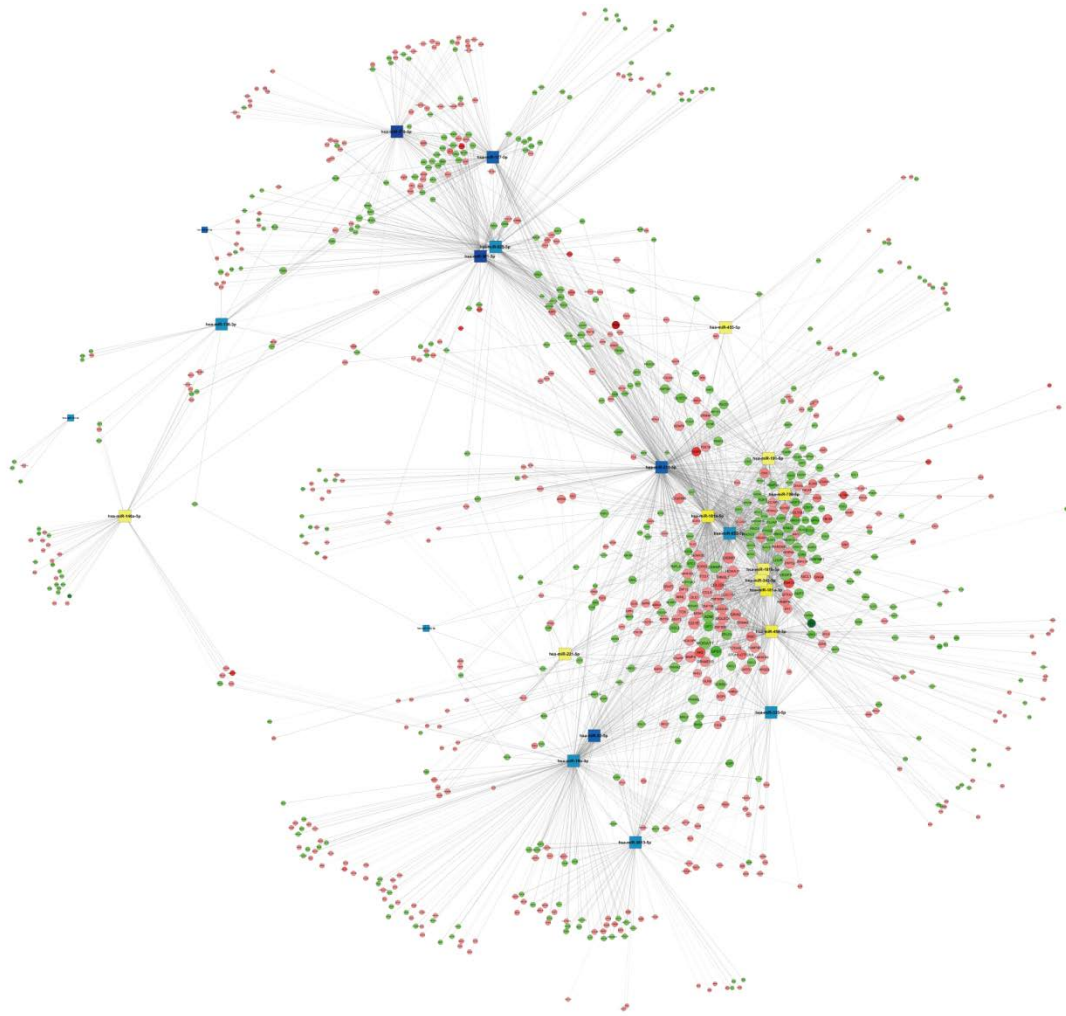

**Supplementary Figure 4. The miRNA-mRNA interacting network.** The differentially expressed mRNAs identified previously (Figure 1A) overlap with the predicted miRNAs targets, and only the genes that negatively correlated with its corresponding miRNAs are included. These inversely correlated miRNA/mRNA pairs were sorted to construct the networks. Circle nodes represent mRNAs and square nodes represent miRNAs. Red and yellow color represent up regulation, and green and blue color represent down regulation respectively. The shade darkness represents fold change. The size of circle represents  $p$  value with larger size owing smaller  $p$  value. Solid lines represent positive relationship and dash lines represent negative relationship.

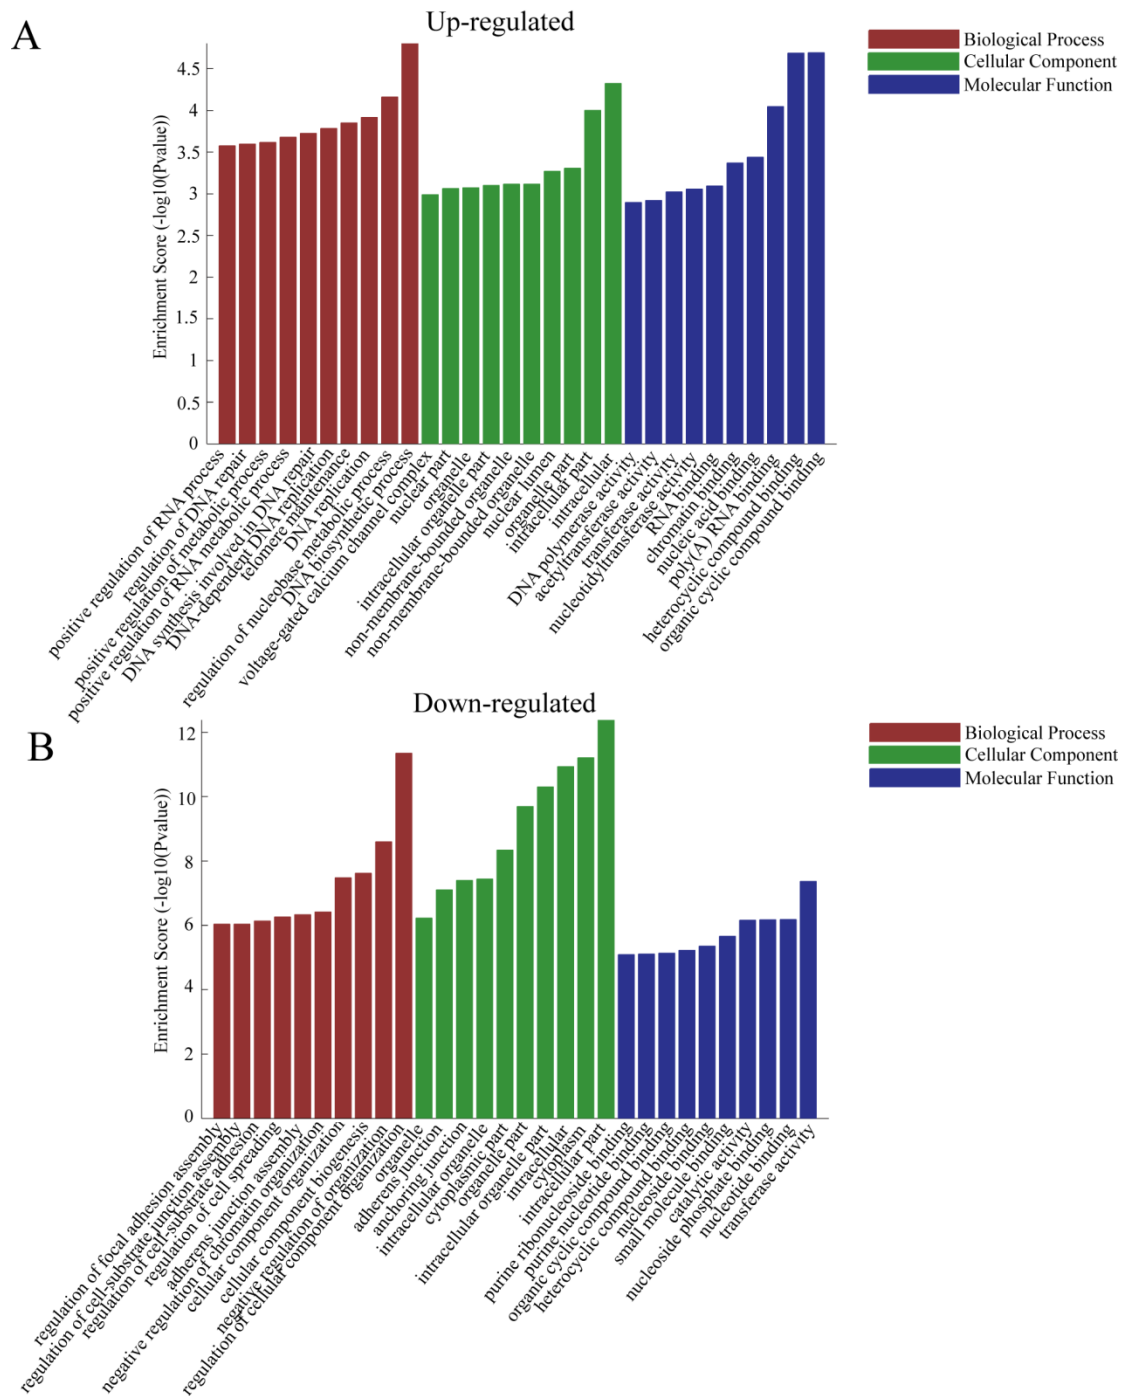

**Supplementary Figure 5. GO and KEGG pathway analysis of circRNAs-related linear counterparts.** (A-B) GO annotation of the linear counterparts of up- (A) and down-regulated (B) circRNAs with top ten enrichment score covering domains of biological processes, cellular components and molecular functions was performed. Both up- and down-regulated miRNAs are significantly changed with fold change > 2.0,  $p < 0.05$  between OLF and normal LF tissues.

**Supplementary Table 1. The information about the patients**

| <b>Serial number</b> | <b>Age</b> | <b>Sex</b> | <b>Disease</b>  | <b>Tissue</b>              |
|----------------------|------------|------------|-----------------|----------------------------|
| OLF-1#               | 56         | F          | Spinal stenosis | Ossified ligamentum flavum |
| OLF-2#               | 57         | M          | Spinal stenosis | Ossified ligamentum flavum |
| OLF-3#               | 60         | M          | Spinal stenosis | Ossified ligamentum flavum |
| OLF-4#               | 68         | M          | Spinal stenosis | Ossified ligamentum flavum |
| LF-1#                | 42         | M          | Spinal trauma   | Normal ligamentum flavum   |
| LF-2#                | 57         | M          | Spinal trauma   | Normal ligamentum flavum   |
| LF-3#                | 73         | M          | Spinal trauma   | Normal ligamentum flavum   |
| LF-4#                | 40         | F          | Spinal trauma   | Normal ligamentum flavum   |

**Supplementary Table 2. The deregulated expression of mRNAs in microarray in OLF**

| <b>Gene Symbol</b> | <b>Seqname</b> | <b>Regulation</b> | <b>Fold Change</b> | <b>p value</b> |
|--------------------|----------------|-------------------|--------------------|----------------|
| AK5                | NM_174858      | up                | 24.6237614         | 0.002139029    |
| COL2A1             | NM_001844      | up                | 24.3281001         | 0.000183825    |
| PMF1-BGLAP         | NM_001199661   | up                | 14.0520984         | 0.001964946    |
| RUNX2              | NM_001024630   | up                | 10.5248663         | 0.04779347     |
| BMP4               | NM_001202      | up                | 4.7992443          | 0.00207799     |
| IL6                | NM_000600      | down              | 62.2617382         | 0.027100353    |
| CRACR2B            | NM_001286606   | down              | 20.0370609         | 0.018754584    |
| SAA1               | NM_000331      | down              | 14.8008962         | 0.00492719     |
| G0S2               | NM_015714      | down              | 13.6180691         | 0.007933331    |
| ATF3               | NM_001674      | down              | 7.0536263          | 0.002535643    |

**Supplementary Table 3. The deregulated expression of lncRNAs in microarray in OLF**

| <b>Gene Symbol</b> | <b>Seqname</b>  | <b>Regulation</b> | <b>Fold Change</b> | <b>p value</b> |
|--------------------|-----------------|-------------------|--------------------|----------------|
| RP11-644F5.16      | ENST00000556606 | up                | 48.3224434         | 0.002456396    |
| LOC101927269       | NR_110075       | up                | 31.1198732         | 0.001515081    |
| LINC00347          | NR_034024       | up                | 17.0523229         | 0.001624259    |
| CTD-2249K22.1      | ENST00000512859 | up                | 2.275214           | 0.013428992    |
| LINC01135          | NR_034015       | up                | 2.9781847          | 0.000480586    |
| LOC100505817       | NR_038340       | down              | 25.5974901         | 0.027545948    |
| RP11-109E24.1      | ENST00000511279 | down              | 11.7276114         | 0.004813486    |
| AQP7P3             | NR_026558       | down              | 9.1849429          | 0.010875482    |
| RP11-720L8.1       | ENST00000561054 | down              | 6.9156078          | 0.001576764    |
| lncMIAT            | NR_033319       | down              | 2.6070678          | 0.015431081    |
| RP11-523G9.3       | ENST00000608133 | up                | 2.5794996          | 0.029309278    |
| CTB-180A7.6        | ENST00000599584 | up                | 2.5120166          | 0.013285599    |

**Supplementary Table 4. The deregulated expression of miRNAs in sequencing in OLF**

| <b>Gene Symbol</b>       | <b>Regulation</b> | <b>Fold Change</b> | <b>p value</b> |
|--------------------------|-------------------|--------------------|----------------|
| hsa-miR-181a-5p          | up                | 5.013659           | 9.87557E-05    |
| hsa-miR-181a-3p          | up                | 4.609562           | 0.004157204    |
| hsa-miR-708-5p           | up                | 3.632302           | 0.009366564    |
| hsa-miR-181b-5p          | up                | 2.738144           | 0.006102139    |
| hsa-miR-146a-5p          | up                | 2.538066           | 0.023043047    |
| hsa-miR-889-3p           | down              | 2.949365297        | 0.007410704    |
| hsa-miR-32-5p            | down              | 3.371430498        | 0.03504732     |
| hsa-miR-379-5p           | down              | 4.340579207        | 0.02562263     |
| hsa-miR-novel-chrX_47539 | down              | 5.016881807        | 0.007573798    |
| hsa-miR-381-3p           | down              | 5.930389093        | 6.51417E-05    |
| hsa-miR-19b-3p           | down              | 2.069497878        | 0.006346186    |



**Supplementary Table 5. The deregulated expression of circRNAs in microarray**

| <b>Gene Symbol</b> | <b>Regulation</b> | <b>Fold Change</b> | <b>p value</b> |
|--------------------|-------------------|--------------------|----------------|
| hsa_circ_0000367   | up                | 30.7576643         | 2.25293E-06    |
| hsa_circ_0004183   | up                | 20.0548723         | 0.002363038    |
| hsa_circ_0006220   | up                | 16.0456877         | 3.82059E-06    |
| hsa_circ_0001666   | up                | 37.4327367         | 4.4194E-06     |
| hsa_circ_0004099   | up                | 28.1184624         | 0.002744821    |
| hsa_circ_0001873   | down              | 4.6512421          | 0.000257104    |
| hsa_circ_0023016   | down              | 15.5507265         | 0.028144848    |
| hsa_circ_0003748   | down              | 15.0729102         | 0.021007797    |
| hsa_circ_0092360   | down              | 14.1954431         | 0.036578546    |
| hsa_circ_0001296   | down              | 13.4871247         | 0.016418551    |
| hsa_circ_0050139   | up                | 2.3049384          | 0.003656394    |

**Supplementary Table 6. Primers for qPCR, Related to Experimental Procedures****qPCR primers for analysis of mRNA**

| <b>Gene symbol</b> | <b>Forward 5' - 3'</b>   | <b>Reverse 5' - 3'</b>   |
|--------------------|--------------------------|--------------------------|
| AK5                | CCTGATGAAGAGGGCATTGT     | TGATTAGCACAAAGCCAGGAA    |
| COL2A1             | AAGGGTGATCGTGGTGAGAC     | GCACCAGCTTCTCCTCTGTC     |
| CRACR2B            | ACAAGGAGGCTAAGGGCTTC     | GGTGAGGAAGCCAGTGTGA      |
| Runx2              | TGCGGCCGCCCCACGACAA      | ACCCGCCATGACAGTAACCACAGT |
| BGLAP              | CACTCCTCGCCCTATTGGC      | CCCTCCTGCTTGGACACAAAG    |
| SAA1               | CGGCTCAGACAAATACTTCCA    | CACCATGGCCAAAGAATCTC     |
| IL6                | CTCAATATTAGAGTCTCAACCCCA | GAGAAGGCAACTGGACCGAA     |
| BMP4               | CGTCCAAGCTATCTCGAGCC     | CATAGGTCCCTGCAGTAGCG     |
| G0S2               | GCCGTGCCACTAAGGTCATT     | GATCAGCTCCTGGACCGTTT     |
| ATF3               | TGATGCTTCAACACCCAGGC     | GGATGGCAAACCTCAGCTCT     |
| GAPDH              | ACCCAGAAGACTGTGGATGG     | TTCAGCTCAGGGATGACCTT     |

**qPCR primers for analysis of lncRNA**

| <b>Seqname</b>  | <b>Forward 5' - 3'</b>  | <b>Reverse 5' - 3'</b> |
|-----------------|-------------------------|------------------------|
| ENST00000556606 | AGAGGCTGGGCTACAGAAGAA   | GAGGCTCTGCTCTTGTGCG    |
| ENST00000512859 | GTGTGGGGTACGTTACCTT     | ACGGGCAGGTTTATTTGGGT   |
| ENST00000511279 | TGCCAGATTCATGATGCCAC    | GCTCCTCAGTTGTAGCCTCTC  |
| ENST00000561054 | TGGGGAACCAGCAAACATCAT   | ACTGACAAACTCCCACGCTG   |
| NR_033319       | AGGATTCCTTGCATGGGGTG    | CCCAAGAAGCACCGTGAGAT   |
| NR_110075       | GAGCTGTAGCAGAAAAGCAAGT  | TCCAATCCATTGTCCACGCT   |
| NR_034024       | GAGGAGGGGCCTTTCATAGC    | CAATTACCACAGGCGGACCT   |
| NR_034015       | AGCGCTAGACACATGGAACC    | TTCCAGCGCGACTGTTGTTA   |
| NR_038340       | GGTGACCTGGGCTCCTTATG    | CTGCAAGTGTCTTCCTGTGGA  |
| NR_026558       | CATGGTTCAAGCATCTGGGC    | TAGAGCCTGCATCGTGGTTC   |
| ENST00000608133 | AGAGGCATTTGTTCGGTAGTTTT | TCTGATGGGCATCCACACATT  |
| ENST00000599584 | CCGAGGAGGGTTTCTCTAGC    | GTCCCTCCACAGCCCTTAAC   |

**qPCR primers for analysis of miRNA**

| <b>Gene symbol</b>       | <b>primers</b>           |
|--------------------------|--------------------------|
| hsa-miR-181a-5p          | AACATTCAACGCTGTCGGTGA    |
| hsa-miR-181a-3p          | ACCATCGACCGTTGATTGTAC    |
| hsa-miR-708-5p           | AAGGAGCTTACAATCTAGCTGG   |
| hsa-miR-181b-5p          | AACATTCATTGCTGTCGGTGG    |
| hsa-miR-146a-5p          | ATGAGAACTGAATTCCATGGGTT  |
| hsa-miR-379-5p           | TGGTAGACTATGGAACGTAGG    |
| hsa-miR-novel-chrX_47539 | ACTCGATGTTGGATCAGGACA    |
| hsa-miR-381-3p           | TATACAAGGGCAAGCTCTCTGT   |
| hsa-miR-889-3p           | CGTTAATATCGGACAACCATTGT  |
| hsa-miR-32-5p            | CGTATTGCACATTACTAAGTTGCA |
| hsa-miR-19b-3p           | TGTGCAAATCCATGCAAAACTGA  |

**qPCR primers for analysis of circRNA**

| <b>Gene symbol</b> | <b>Forward 5' - 3'</b>  | <b>Reverse 5' - 3'</b> |
|--------------------|-------------------------|------------------------|
| hsa_circ_0000367   | AGACTGGCGTGAAACCTTCC    | CGTATGGAATGGACCTGGACA  |
| hsa_circ_0001873   | CTGAGCTCATGTGAGGGTGA    | TCGTGCGGATGATCGGGATA   |
| hsa_circ_0004183   | CGTCCATTCCACGAGGTTCT    | TTCAAGGCAGCCAGCATGTC   |
| hsa_circ_0006220   | TGCATCTACCCTGCTGAACCT   | TTGGCTACATCCTGCAGTGAAA |
| hsa_circ_0023016   | GAGAGTCTCACTGCTCCAGGG   | CCACACACATCCCCTACTACC  |
| hsa_circ_0003748   | TGTGGCATGCAGCCATAAGTT   | GCTGGTGACATTTTCATGCTC  |
| hsa_circ_0001666   | GCCTAGCTGTCAAGGAGTGG    | CTTGCAAACCTCTCACACCCA  |
| hsa_circ_0004099   | AGGTTTTTGAAGTCTCGGGG    | GGCACCATCCCTGGCTTTAGA  |
| hsa_circ_0092360   | GGCCGGAAGTGACCGATTTC    | CAGCCGTGTTCCCAATTTCGT  |
| hsa_circ_0001296   | GTGTGCTGTGATGAGGAAGATGA | AGCACGCCGTTCAATCACAT   |
| hsa_circ_0050139   | CCCCATGACTCAGGGTTTTGA   | TCTTCTTGCGGCAGTTGACA   |

**siRNA sequences for lncRNAs and circRNA**

| <b>Gene symbol</b> | <b>Forward 5' - 3'</b> | <b>Reverse 5' - 3'</b> |
|--------------------|------------------------|------------------------|
| siENST00000608133  | GAAGGCACCAUUUAACAAATT  | UUUGUAAAUGGUGCCUUCTT   |
| siENST00000599584  | GGCUUUGGAUGAGACCGUATT  | UACGGUCUCAUCCAAAGCCTT  |
| sihsa_circ_0050139 | GCUGCUCAGUGCUAUGCUCTT  | GAGCAUAGCACUGAGCAGCTT  |
